# Supplementary material for: Approaching optimal hole transport layers by an organic monomolecular strategy for efficient inverted perovskite solar cells
Source: Royal Society of Chemistry journal article supplement (doi:10.1039/c9ta13167a), 2020-01-01
Supplement: c9ta13167a1.pdf [file c9ta13167a1.pdf]

## Supporting Information

### Approaching Optimal Hole Transport Layers by Organic Monomolecular Strategy for Efficient Inverted Perovskite Solar Cells

Wang Li,<sup>1,2†</sup> Hui Liu,<sup>1,2†</sup> Changwen Liu,<sup>1,2†</sup> Weiguang Kong,<sup>1,2</sup> Hong Chen,<sup>1,2</sup> Weijun Wang,<sup>1,2</sup> Haichao Zhang,<sup>1,2</sup> Xian Zhang,<sup>1,2</sup> Chun Cheng<sup>1,2\*</sup>

<sup>1</sup>Department of Materials Science and Engineering, Southern University of Science and Technology (SUSTech), Shenzhen, 518055, China

<sup>2</sup>Shenzhen Engineering Research and Development Center for Flexible Solar Cells, Southern University of Science and Technology (SUSTech), Shenzhen, 518055, China

E-mail: chengc@sustech.edu.cn

†These authors contributed equally.

### Experimental Section

*Materials and Methods:* Indium tin oxide (ITO, 15  $\Omega$  sq<sup>-1</sup>) glasses were purchased from Ying Kou You Xuan Trade Co. Ltd., China. PbI<sub>2</sub> (99.9985%) was purchased from Alfa Aesar, United States. PEDOT:PSS (Baytron PVP Al 4083) was bought from Baytron Company. TAPC, PTAA, MAI, PbCl<sub>2</sub>, C<sub>60</sub> and BCP were purchased from Xi'an Polymer Light Technology Corp, China. All solvents, such as N, N-dimethylformamide (DMF), isopropanol (IPA), chlorobenzene (CB), and dimethyl sulfoxide (DMSO) were purchased from Sigma-Aldrich, United States. These materials were used without purification.

*Device fabrication:* ITO glasses were cleaned in detergent, deionized water, IPA and ethanol for 15 min each by consecutive sonification. After drying with nitrogen flow, ITO glasses were treated by UV-ozone treatment for 10 min. PEDOT:PSS (filtered by a 0.45  $\mu$ m filter) was spin coated onto the precleaned ITO substrates at 6000 rpm for 45s. After that, substrates were moved into glovebox. TAPC (10 mg/ml dissolved in CB) and PTAA (2 mg/ml dissolved in CB) were spin coated onto the pre-cleaned ITO substrates at 4000 rpm for 25s. All the p-HTLs were annealed at 110 °C for 10 min. For the preparation of ML-HTLs, CB was used to wash the p-TAPC and p-PTAA films, while deionized water was used to rinse away the redundant PEDOT:PSS. The prepared ML-HTLs were used directly for perovskite deposition. The perovskite precursor solution was prepared by dissolving 497.88 mg PbI<sub>2</sub>, 33.37 mg PbCl<sub>2</sub>, and 190.8 mg MAI in 0.9 mL DMF and 0.1 mL DMSO mixed solvent. The precursor was dripped on the ITO substrates and spin-coated at 700 rpm for 2s and 4000 rpm for 25s. 100  $\mu$ L of CB was dripped within 1s onto the substrate at 18s before the

end. Then, the film was annealed at 105 °C for 5 min. Finally, C<sub>60</sub> (40 nm), BCP (8 nm), and Ag (100 nm) were sequentially deposited on the perovskite film by thermal evaporation through a shadow mask with a defined active area of 0.10 cm<sup>2</sup>.

*Characterizations:* All measurements were done at room temperature (298 K) and all samples in each test were measured in the same conditions. The thickness of films was measured by Dektak 8 Stylus Profiler. The morphology of perovskite and HTL films were characterized by scanning electron microscopy (SEM, TESCAN MIRA3), the electron beam is accelerated at 5 kV. Atomic force microscope (AFM) images of HTLs films were collected on a multimode SPM (Bruker) with tapping mode. The thickness was further measured using a dual rotating-compensator (Horibar-UVISEL ellipsometer, SUSTech CRF, Shenzhen, China). UPS analysis was conducted on the X-ray photoelectron spectrometer (Thermo Fischer, ESCALAB 250Xi) with an unfiltered He I (21.22 eV) gas discharge lamp and a hemispherical analyzer. Steady-state and time-resolved PL spectra were measured using an Edinburgh FLS5 spectroscopy system, and the pulsed laser wavelength was 405 nm. The excitation density of 5 nJ/cm<sup>2</sup> was used to avoid nonlinear effects. Photocurrent density-voltage (*J-V*) curves were measured under AM 1.5 G one sun illumination (100 mW/cm<sup>2</sup>) with a solar simulator (Enlitech SS-F7-3A) equipped with a 300 W Xenon lamp and a Keithley 2400 source meter. For scan test, the *J-V* curves were tested from 1.2 to 0 V and 0 to 1.2 V with a scan velocity of 100 mV s<sup>-1</sup>. For steady-state test, the voltage is fixed on the maximum power point to test the current output for all the test time. The light intensity was calibrated by NREL-calibrated Si solar cell. During measurement, the cell was covered by a mask with 0.1 cm<sup>2</sup> aperture. The external quantum efficiency (EQE) values were measured using an EQE system (Enlitech QE-R3011) containing a Xenon lamp, a monochromator, a Si detector for calibration, and a dual-channel power.

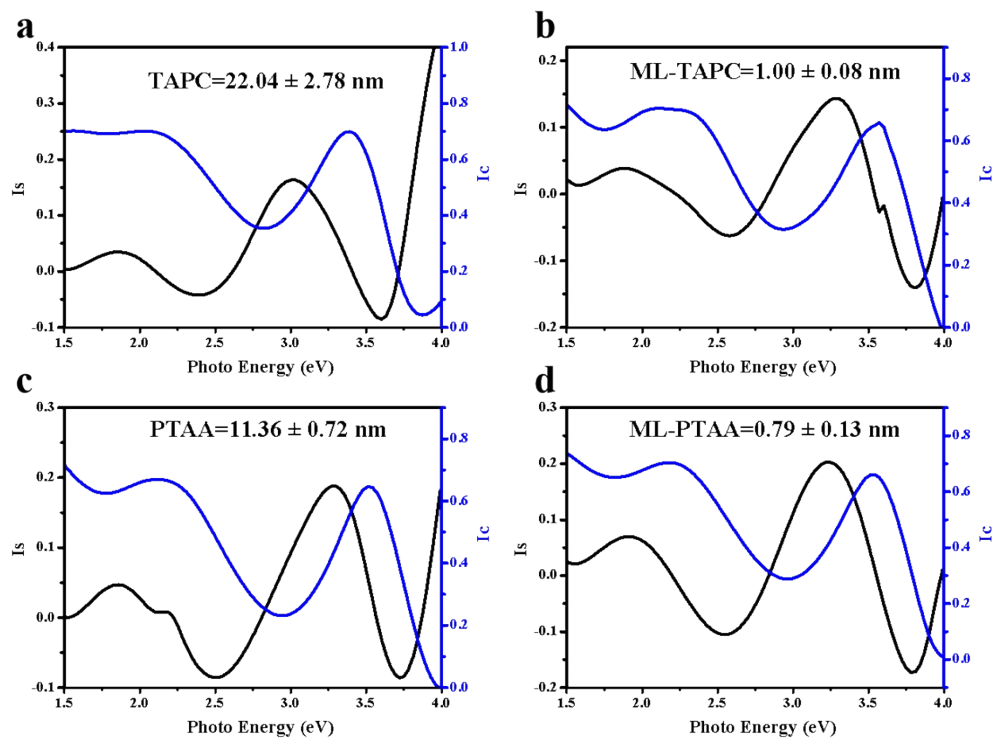

**Figure S1.** The thicknesses of (a) TAPC, (b) ML-TAPC, (c) PTAA and (d) ML-PTAA layer measured by ellipsometer.

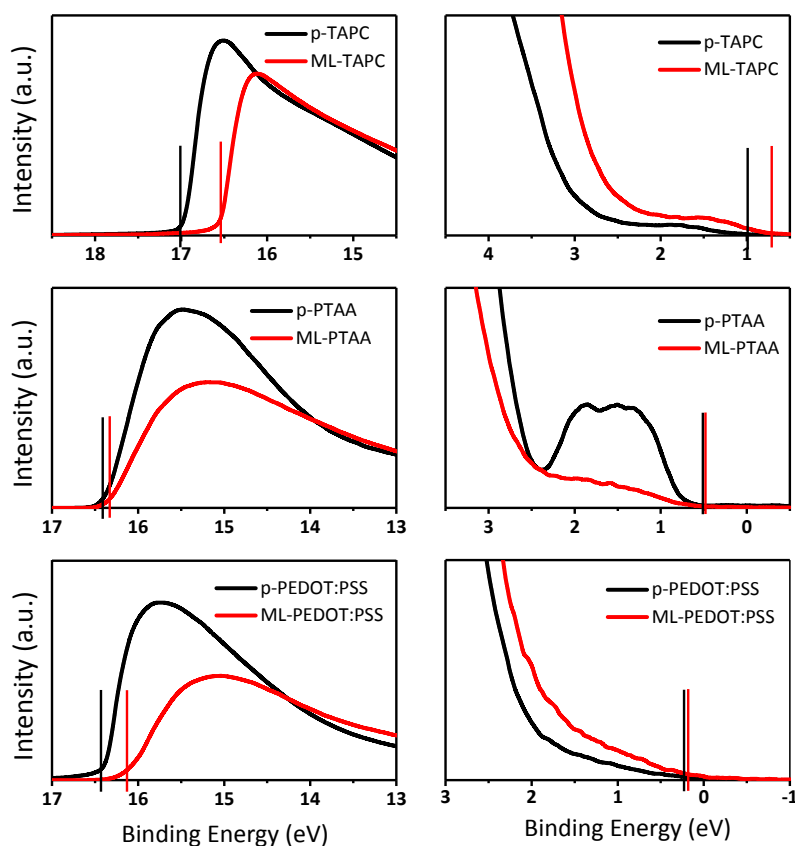

**Figure S2.** UPS spectra of p-HTLs and ML-HTLs for TAPC, PTAA, and PEDOT:PSS.

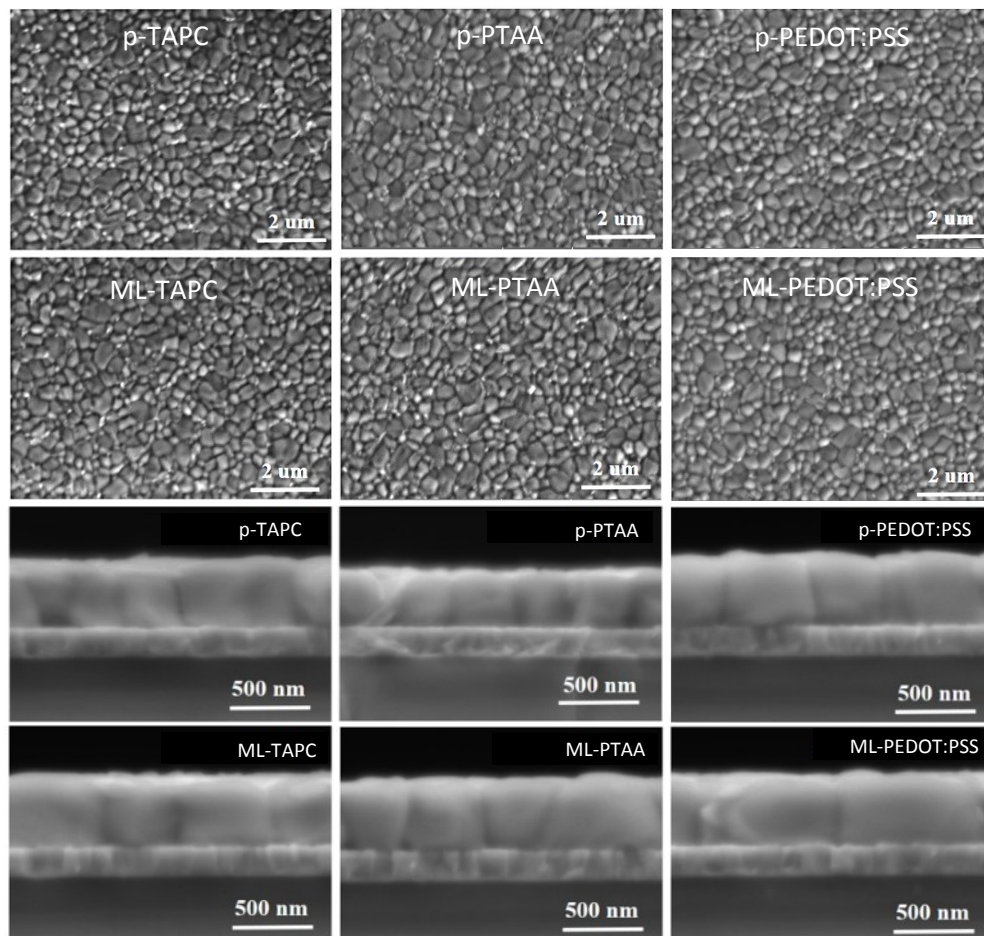

**Figure S3.** Top (4000×) and cross-sectional (20000×) view of SEM images of perovskite films on p-HTLs and ML-HTLs.

The SEM images reveal that the as-formed  $\text{MAPbI}_{3-x}\text{Cl}_x$  films on HTLs exhibit similar morphologies, for example, uniform, compact and with similar grain size.

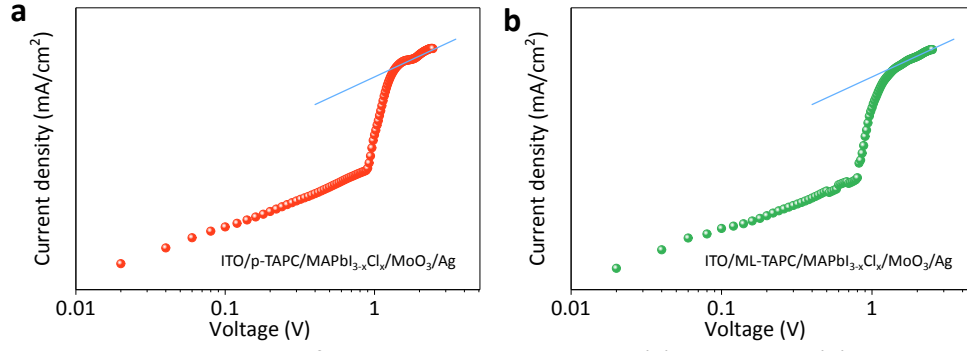

**Figure S4.** SCLC analysis of hole-only devices based on (a) p-TAPC and (b) ML-TAPC.

The hole mobility can be calculated in the SCLC region according to Mott-Gurney law,

$$J = \frac{9}{8} \epsilon_0 \epsilon_r \mu \frac{V^2}{L^3}$$

where  $\epsilon_r = 25$  and  $L = 300$  nm. For hole-only devices based on p-TAPC and ML-TAPC, the calculated mobility ( $\mu$ ) is both  $3.7 \times 10^{-2} \text{ cm}^2\text{V}^{-1}\text{s}^{-1}$ .

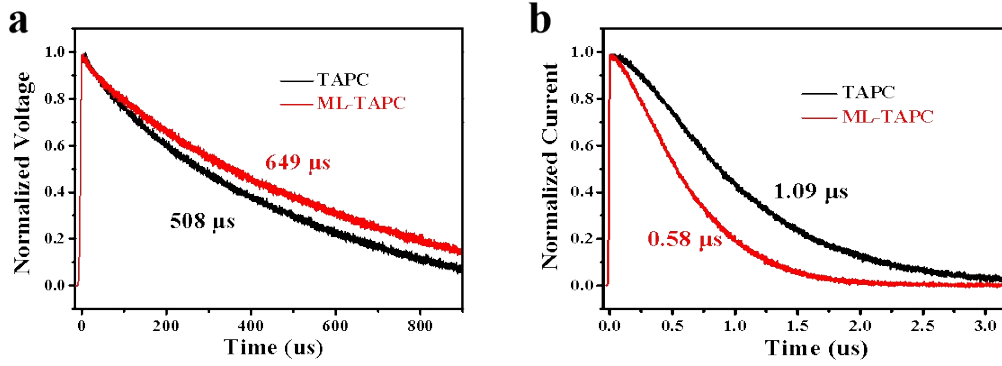

**Figure S5.** (a) Transient photovoltage and (b) transient photocurrent measurements for TAPC- and ML-TAPC-based PSCs.

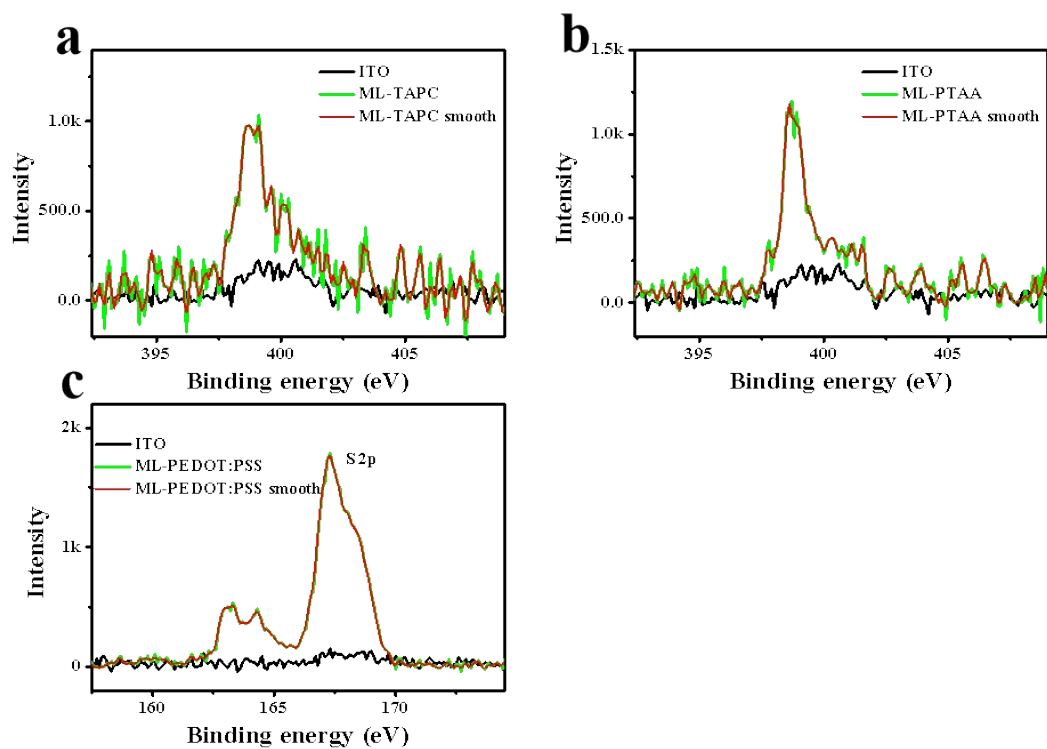

**Figure S6.** XPS spectra of (a) N 1s of ML-TAPC, (b) N 1s of ML-PTAA, and (c) S 2p of ML-PEDOT:PSS.

**Table S1.**  $E_f$  and HOMO values of p-HTLs and ML-HTLs obtained from UPS spectra.

|                                                   | $E_f$ (eV) | $E_{\text{offset}}$ (eV) | HOMO (eV) | $\Delta E$ (eV) | $E_{\text{ID}}$ (eV) |
|---------------------------------------------------|------------|--------------------------|-----------|-----------------|----------------------|
| ITO <sup>1</sup>                                  | -4.32      | -                        | -         | -               | -                    |
| p-TAPC                                            | -4.21      | 0.99                     | -5.20     | 0.20            | -                    |
| ML-TAPC                                           | -4.68      | 0.71                     | -5.39     | <b>0.01</b>     | 0.36                 |
| p-PTAA                                            | -4.81      | 0.51                     | -5.32     | 0.08            | -                    |
| ML-PTAA                                           | -4.89      | 0.48                     | -5.37     | <b>0.03</b>     | 0.57                 |
| p-PEDOT:PSS                                       | -4.79      | 0.23                     | -5.02     | 0.38            | -                    |
| ML-PEDOT:PSS                                      | -5.09      | 0.18                     | -5.27     | <b>0.13</b>     | 0.77                 |
| MAPbI <sub>3-x</sub> Cl <sub>x</sub> <sup>1</sup> | -4.60      | 0.80                     | -5.40     | -               | -                    |

**Table S2.** Fitted parameters of TRPL spectra for perovskite grown on different substrates.

|                    | $A_1$ (%) | $\tau_1$ (ns) | $A_2$ (%) | $\tau_2$ (ns) | $\tau_{ave}$ (ns) |
|--------------------|-----------|---------------|-----------|---------------|-------------------|
| ITO/Perovskite     | 28.8      | 31.4          | 65.0      | 71.5          | 65.0              |
| p-TAPC/Perovskite  | 50.9      | 12.8          | 49.6      | 34.3          | 28.3              |
| ML-TAPC/Perovskite | 40.0      | 12.0          | 60.0      | 12.0          | 12.0              |

The TRPL spectra were fitted by a bi-exponential decay function,

$$I(t) = A_1 e^{-t/\tau_1} + A_2 e^{-t/\tau_2}$$

and the average PL lifetime is calculated by

$$\tau_{ave} = \frac{A_1 \tau_1^2 + A_2 \tau_2^2}{A_1 \tau_1 + A_2 \tau_2}$$

**Table S3.** Summary of photovoltaic parameters of devices based on the investigated HTLs.

|              | $V_{oc}$ (V) | $J_{sc}$ (mA/cm <sup>2</sup> ) | FF (%)       | PCE (%)      | $R_s$ ( $\Omega \cdot \text{cm}^2$ ) | $R_{sh}$ (k $\Omega \cdot \text{cm}^2$ ) |
|--------------|--------------|--------------------------------|--------------|--------------|--------------------------------------|------------------------------------------|
| p-TAPC       | 1.10         | 22.66                          | 78.82        | 19.62        | 1.5                                  | 4.2                                      |
|              | 1.10 ± 0.01  | 21.84 ± 0.57                   | 77.21 ± 2.04 | 18.53 ± 0.65 |                                      |                                          |
| ML-TAPC      | 1.10         | 22.77                          | 81.86        | 20.58        | 1.1                                  | 5.8                                      |
|              | 1.10 ± 0.00  | 21.95 ± 0.46                   | 80.43 ± 1.16 | 19.45 ± 0.46 |                                      |                                          |
| p-PTAA       | 1.09         | 22.10                          | 78.83        | 19.02        | 1.6                                  | 4.5                                      |
|              | 1.08 ± 0.01  | 21.47 ± 0.45                   | 78.90 ± 0.87 | 18.34 ± 0.46 |                                      |                                          |
| ML-PTAA      | 1.09         | 21.83                          | 80.30        | 19.16        | 1.2                                  | 5.3                                      |
|              | 1.09 ± 0.01  | 21.56 ± 0.32                   | 79.29 ± 0.94 | 18.62 ± 0.34 |                                      |                                          |
| p-PEDOT:PSS  | 1.02         | 21.16                          | 77.30        | 16.68        | 2.1                                  | 3.8                                      |
|              | 1.00 ± 0.01  | 20.25 ± 0.66                   | 76.24 ± 1.92 | 15.38 ± 0.70 |                                      |                                          |
| ML-PEDOT:PSS | 1.02         | 20.59                          | 80.33        | 16.86        | 1.5                                  | 4.9                                      |
|              | 1.01 ± 0.01  | 20.79 ± 0.47                   | 77.39 ± 1.15 | 16.18 ± 0.50 |                                      |                                          |

**Table S4.** Summary of photovoltaic parameters of champion devices with forward and reverse scan.

|         |         | $V_{oc}$ (V) | $J_{sc}$ (mA/cm <sup>2</sup> ) | FF (%) | PCE (%) |
|---------|---------|--------------|--------------------------------|--------|---------|
| p-TAPC  | Forward | 1.10         | 22.66                          | 78.82  | 19.62   |
|         | Reverse | 1.09         | 22.69                          | 73.45  | 18.20   |
| ML-TAPC | Forward | 1.10         | 22.77                          | 81.86  | 20.58   |
|         | Reverse | 1.10         | 22.68                          | 79.65  | 19.89   |

**Table S5.** Hysteresis index calculated from the best devices based on p-TAPC and ML-TAPC.

|         |         | $V_{oc}$ (V) | $J$ at 80% of $V_{oc}$ (mA/cm <sup>2</sup> ) | Hysteresis index |
|---------|---------|--------------|----------------------------------------------|------------------|
| p-TAPC  | Forward | 1.10         | 21.72                                        | 0.059            |
|         | Reverse | 1.09         | 20.51                                        |                  |
| ML-TAPC | Forward | 1.10         | 22.26                                        | 0.028            |
|         | Reverse | 1.10         | 21.65                                        |                  |

The hysteresis index is calculated by

$$\text{Hysteresis index} = \frac{J_{RS}(0.8V_{oc}) - J_{FS}(0.8V_{oc})}{J_{RS}(0.8V_{oc})}$$

where  $J_{RS}$  ( $0.8V_{oc}$ ) and  $J_{FS}$  ( $0.8V_{oc}$ ) represent photocurrent density at 80% of  $V_{oc}$  for the reverse scan (RS) and forward scan (FS), respectively.<sup>2</sup>

**Table S6.** Photovoltaic parameters of devices based on PTAA with various rinsing times, measured under AM1.5G illumination (100 mW cm<sup>-2</sup>).

| Times | $V_{oc}$ (V) | $J_{sc}$ (mA/cm <sup>2</sup> ) | FF (%)       | PCE (%)      |
|-------|--------------|--------------------------------|--------------|--------------|
| 0     | 1.09         | 22.10                          | 78.83        | 19.02        |
|       | 1.08 ± 0.01  | 21.47 ± 0.45                   | 78.90 ± 0.87 | 18.34 ± 0.46 |
| 1     | 1.09         | 21.83                          | 80.30        | 19.16        |
|       | 1.09 ± 0.01  | 21.56 ± 0.32                   | 79.29 ± 0.94 | 18.62 ± 0.34 |
| 5     | 1.09         | 21.65                          | 80.22        | 18.91        |
|       | 1.09 ± 0.01  | 21.51 ± 0.35                   | 79.17 ± 1.78 | 18.56 ± 0.25 |

Data obtained by averaging 10 optimized devices

## Reference

1. W. Kong, W. Li, C. Liu, H. Liu, J. Miao, W. Wang, S. Chen, M. Hu, D. Li, A. Amini, S. Yang, J. Wang, B. Xu, C. Cheng, *ACS Nano* **2019**, *13*, 1625.
2. H.-S. Kim, N.-G. Park, *J. Phys. Chem. Lett.* **2014**, *5*, 2927.
